# Supplementary material
Source: publisher figshare collection journal article supplement (https://acs.figshare.com/ndownloader/files/3828307)
Supplement: Supplementary file 1 [file 3828307]

data_songxr1015
_audit_creation_date              2014-10-15
_audit_creation_method
;
Olex2 1.2
(compiled 2014.09.19 svn.r3010 for OlexSys, GUI svn.r4874)
;
_publ_contact_author_address      ?
_publ_contact_author_email        ?
_publ_contact_author_name         ''
_publ_contact_author_phone        ?
_publ_section_references
;
Dolomanov, O.V., Bourhis, L.J., Gildea, R.J, Howard, J.A.K. & Puschmann, H.
 (2009), J. Appl. Cryst. 42, 339-341.

Sheldrick, G.M. (2008). Acta Cryst. A64, 112-122.
;
_chemical_name_common             ?
_chemical_name_systematic
;
 ? 
;
_chemical_formula_moiety          'C21 H13 Cl2 N O'
_chemical_formula_sum             'C21 H13 Cl2 N O'
_chemical_formula_weight          366.22
_chemical_melting_point           ?
loop_
  _atom_type_symbol
  _atom_type_description
  _atom_type_scat_dispersion_real
  _atom_type_scat_dispersion_imag
  _atom_type_scat_source
 'C' 'C' 0.0033 0.0016 'International Tables Vol C Tables 4.2.6.8 and 6.1.1.4'
 'H' 'H' 0.0000 0.0000 'International Tables Vol C Tables 4.2.6.8 and 6.1.1.4'
 'Cl' 'Cl' 0.1484 0.1585 'International Tables Vol C Tables 4.2.6.8 and 6.1.1.4'
 'N' 'N' 0.0061 0.0033 'International Tables Vol C Tables 4.2.6.8 and 6.1.1.4'
 'O' 'O' 0.0106 0.0060 'International Tables Vol C Tables 4.2.6.8 and 6.1.1.4'

_space_group_crystal_system       'monoclinic'
_space_group_IT_number            14
_space_group_name_H-M_alt         'P 1 21/n 1'
_space_group_name_Hall            '-P 2yn'
loop_
  _space_group_symop_id
  _space_group_symop_operation_xyz
 1 'x, y, z'
 2 '-x+1/2, y+1/2, -z+1/2'
 3 '-x, -y, -z'
 4 'x-1/2, -y-1/2, z-1/2'

_cell_length_a                    15.3129(5)
_cell_length_b                    6.1061(2)
_cell_length_c                    18.3965(7)
_cell_angle_alpha                 90.00
_cell_angle_beta                  97.713(4)
_cell_angle_gamma                 90.00
_cell_volume                      1704.56(11)
_cell_formula_units_Z             4
_cell_measurement_reflns_used     1549
_cell_measurement_temperature     293(2)
_cell_measurement_theta_max       22.2200
_cell_measurement_theta_min       3.8140
_exptl_absorpt_coefficient_mu     0.389
_exptl_absorpt_correction_T_max   1.00000
_exptl_absorpt_correction_T_min   0.89876
_exptl_absorpt_correction_type    multi-scan
_exptl_absorpt_process_details
;
CrysAlisPro, Agilent Technologies,
Version 1.171.36.32 (release 02-08-2013 CrysAlis171 .NET)
(compiled Aug  2 2013,16:46:58)
Empirical absorption correction using spherical harmonics,
 implemented in SCALE3 ABSPACK scaling algorithm.
;
_exptl_crystal_colour             'clear light colourless'
_exptl_crystal_density_diffrn     1.427
_exptl_crystal_density_meas       ?
_exptl_crystal_density_method     'not measured'
_exptl_crystal_description        block
_exptl_crystal_F_000              752
_exptl_crystal_size_max           0.28
_exptl_crystal_size_mid           0.24
_exptl_crystal_size_min           0.13
_exptl_special_details
;
 ? 
;
_diffrn_reflns_av_R_equivalents   0.0394
_diffrn_reflns_av_unetI/netI      0.0687
_diffrn_reflns_limit_h_max        18
_diffrn_reflns_limit_h_min        -18
_diffrn_reflns_limit_k_max        7
_diffrn_reflns_limit_k_min        -7
_diffrn_reflns_limit_l_max        22
_diffrn_reflns_limit_l_min        -14
_diffrn_reflns_number             6995
_diffrn_reflns_theta_full         25.50
_diffrn_reflns_theta_max          26.02
_diffrn_reflns_theta_min          3.44
_diffrn_ambient_temperature       293(2)
_diffrn_detector_area_resol_mean  16.0733
_diffrn_measured_fraction_theta_full 0.996
_diffrn_measured_fraction_theta_max 0.996
_diffrn_measurement_details
;
#__ type_ start__ end____ width___ exp.time_
  1 omega   43.00   95.50   1.5000   14.0000
omega____ theta____ kappa____ phi______ frames
    -       19.7946  178.0000 -180.0000 35

#__ type_ start__ end____ width___ exp.time_
  2 omega    2.00   86.00   1.5000   14.0000
omega____ theta____ kappa____ phi______ frames
    -       19.7946   57.0000 -120.0000 56

#__ type_ start__ end____ width___ exp.time_
  3 omega   -9.00   39.00   1.5000   14.0000
omega____ theta____ kappa____ phi______ frames
    -       19.7946  -38.0000   90.0000 32

#__ type_ start__ end____ width___ exp.time_
  4 omega   46.00   95.50   1.5000   14.0000
omega____ theta____ kappa____ phi______ frames
    -       19.7946  178.0000   90.0000 33
;
_diffrn_measurement_device_type   'SuperNova, Dual, Cu at zero, Eos'
_diffrn_measurement_method        '\w scans'
_diffrn_orient_matrix_UB_11       -0.0088757000
_diffrn_orient_matrix_UB_12       0.0655817000
_diffrn_orient_matrix_UB_13       0.0300003000
_diffrn_orient_matrix_UB_21       0.0210659000
_diffrn_orient_matrix_UB_22       -0.0786025000
_diffrn_orient_matrix_UB_23       0.0247652000
_diffrn_orient_matrix_UB_31       0.0407806000
_diffrn_orient_matrix_UB_32       0.0548758000
_diffrn_orient_matrix_UB_33       -0.0003094000
_diffrn_radiation_monochromator   mirror
_diffrn_radiation_type            MoK\a
_diffrn_radiation_wavelength      0.71073
_diffrn_source                    'SuperNova (Mo) X-ray Source'
_diffrn_standards_decay_%         ?
_diffrn_standards_interval_count  ?
_diffrn_standards_interval_time   ?
_diffrn_standards_number          ?
_reflns_number_gt                 2019
_reflns_number_total              3354
_reflns_odcompleteness_completeness 99.50
_reflns_odcompleteness_iscentric  1
_reflns_odcompleteness_theta      26.32
_reflns_threshold_expression      >2sigma(I)
_computing_cell_refinement
;
CrysAlisPro, Agilent Technologies,
Version 1.171.36.32 (release 02-08-2013 CrysAlis171 .NET)
(compiled Aug  2 2013,16:46:58)
;
_computing_data_collection
;
CrysAlisPro, Agilent Technologies,
Version 1.171.36.32 (release 02-08-2013 CrysAlis171 .NET)
(compiled Aug  2 2013,16:46:58)
;
_computing_data_reduction
;
CrysAlisPro, Agilent Technologies,
Version 1.171.36.32 (release 02-08-2013 CrysAlis171 .NET)
(compiled Aug  2 2013,16:46:58)
;
_computing_molecular_graphics     'Olex2 (Dolomanov et al., 2009)'
_computing_publication_material   'Olex2 (Dolomanov et al., 2009)'
_computing_structure_refinement   'ShelXL (Sheldrick, 2008)'
_computing_structure_solution     'ShelXS (Sheldrick, 2008)'
_refine_diff_density_max          0.184
_refine_diff_density_min          -0.257
_refine_diff_density_rms          0.049
_refine_ls_extinction_coef        ?
_refine_ls_extinction_method      none
_refine_ls_goodness_of_fit_ref    1.034
_refine_ls_hydrogen_treatment     constr
_refine_ls_matrix_type            full
_refine_ls_number_parameters      226
_refine_ls_number_reflns          3354
_refine_ls_number_restraints      0
_refine_ls_R_factor_all           0.1002
_refine_ls_R_factor_gt            0.0526
_refine_ls_restrained_S_all       1.034
_refine_ls_shift/su_max           0.000
_refine_ls_shift/su_mean          0.000
_refine_ls_structure_factor_coef  Fsqd
_refine_ls_weighting_details
'calc w=1/[\s^2^(Fo^2^)+(0.0300P)^2^+0.2704P] where P=(Fo^2^+2Fc^2^)/3'
_refine_ls_weighting_scheme       calc
_refine_ls_wR_factor_gt           0.0932
_refine_ls_wR_factor_ref          0.1157
_refine_special_details
;
 Refinement of F^2^ against ALL reflections.  The weighted R-factor wR and 
 goodness of fit S are based on F^2^, conventional R-factors R are based 
 on F, with F set to zero for negative F^2^. The threshold expression of 
 F^2^ > 2sigma(F^2^) is used only for calculating R-factors(gt) etc. and is 
 not relevant to the choice of reflections for refinement.  R-factors based 
 on F^2^ are statistically about twice as large as those based on F, and R- 
 factors based on ALL data will be even larger. 
;
_olex2_refinement_description
;
1. Fixed Uiso
 At 1.2 times of:
  All C(H) groups
2.a Aromatic/amide H refined with riding coordinates:
 C20(H20), C18(H18), C8(H8), C21(H21), C17(H17), C11(H11), C12(H12), C15(H15),
 C14(H14), C3(H3), C5(H5), C4(H4), C6(H6)
;
_atom_sites_solution_hydrogens    geom
_atom_sites_solution_primary      direct
_atom_sites_solution_secondary    difmap
loop_
  _atom_site_label
  _atom_site_type_symbol
  _atom_site_fract_x
  _atom_site_fract_y
  _atom_site_fract_z
  _atom_site_U_iso_or_equiv
  _atom_site_adp_type
  _atom_site_occupancy
  _atom_site_calc_flag
  _atom_site_disorder_assembly
  _atom_site_disorder_group
  _atom_site_refinement_flags_posn
 Cl2 Cl 0.96338(6) 0.51096(14) 0.24579(5) 0.0690(3) Uani 1 d . . .
 Cl1 Cl 0.45088(5) 1.53152(17) 0.11797(6) 0.0802(3) Uani 1 d . . .
 O1 O 0.75725(11) 1.6194(3) -0.05308(10) 0.0486(5) Uani 1 d . . .
 N1 N 0.89513(14) 1.6012(4) -0.08178(12) 0.0408(6) Uani 1 d . . .
 C16 C 0.84441(16) 1.0613(4) 0.10036(14) 0.0347(6) Uani 1 d . . .
 C10 C 0.71778(16) 1.3231(4) 0.06558(14) 0.0347(6) Uani 1 d . . .
 C20 C 0.94018(16) 0.7450(4) 0.12031(16) 0.0420(7) Uani 1 d . . .
 H20 H 0.9794 0.6475 0.1032 0.050 Uiso 1 calc . . R
 C18 C 0.82292(17) 1.0316(4) 0.17046(16) 0.0420(7) Uani 1 d . . .
 H18 H 0.7830 1.1268 0.1877 0.050 Uiso 1 calc . . R
 C9 C 0.80753(15) 1.2469(4) 0.05357(14) 0.0349(6) Uani 1 d . . .
 C8 C 0.85618(17) 1.3398(4) 0.00716(15) 0.0405(7) Uani 1 d . . .
 H8 H 0.9118 1.2783 0.0076 0.049 Uiso 1 calc . . R
 C1 C 0.83765(17) 1.5185(5) -0.04334(16) 0.0418(7) Uani 1 d . . .
 C21 C 0.90351(16) 0.9138(4) 0.07604(15) 0.0390(7) Uani 1 d . . .
 H21 H 0.9187 0.9290 0.0290 0.047 Uiso 1 calc . . R
 C17 C 0.85914(18) 0.8640(5) 0.21563(16) 0.0454(7) Uani 1 d . . .
 H17 H 0.8439 0.8472 0.2626 0.055 Uiso 1 calc . . R
 C11 C 0.70446(17) 1.5311(4) 0.09152(15) 0.0396(7) Uani 1 d . . .
 H11 H 0.7514 1.6287 0.0988 0.047 Uiso 1 calc . . R
 C12 C 0.62228(18) 1.5966(5) 0.10693(16) 0.0465(8) Uani 1 d . . .
 H12 H 0.6142 1.7367 0.1247 0.056 Uiso 1 calc . . R
 C19 C 0.91774(17) 0.7235(4) 0.18994(16) 0.0411(7) Uani 1 d . . .
 C15 C 0.64646(17) 1.1803(5) 0.05495(16) 0.0457(8) Uani 1 d . . .
 H15 H 0.6541 1.0394 0.0377 0.055 Uiso 1 calc . . R
 C14 C 0.56410(18) 1.2460(5) 0.06978(17) 0.0531(8) Uani 1 d . . .
 H14 H 0.5166 1.1501 0.0621 0.064 Uiso 1 calc . . R
 C2 C 0.85153(18) 1.7747(5) -0.12023(15) 0.0406(7) Uani 1 d . . .
 C13 C 0.55301(17) 1.4527(5) 0.09576(17) 0.0484(8) Uani 1 d . . .
 C3 C 0.8793(2) 1.9250(5) -0.16833(16) 0.0542(8) Uani 1 d . . .
 H3 H 0.9355 1.9183 -0.1821 0.065 Uiso 1 calc . . R
 C7 C 0.76675(19) 1.7869(5) -0.10202(15) 0.0433(7) Uani 1 d . . .
 C5 C 0.7361(3) 2.0939(6) -0.1753(2) 0.0709(10) Uani 1 d . . .
 H5 H 0.6982 2.2048 -0.1944 0.085 Uiso 1 calc . . R
 C4 C 0.8203(3) 2.0852(6) -0.19507(18) 0.0664(10) Uani 1 d . . .
 H4 H 0.8373 2.1899 -0.2271 0.080 Uiso 1 calc . . R
 C6 C 0.7070(2) 1.9445(6) -0.12850(18) 0.0632(9) Uani 1 d . . .
 H6 H 0.6504 1.9495 -0.1155 0.076 Uiso 1 calc . . R

loop_
  _atom_site_aniso_label
  _atom_site_aniso_U_11
  _atom_site_aniso_U_22
  _atom_site_aniso_U_33
  _atom_site_aniso_U_23
  _atom_site_aniso_U_13
  _atom_site_aniso_U_12
 Cl2 0.0815(6) 0.0583(6) 0.0652(6) 0.0182(5) 0.0023(5) 0.0159(5)
 Cl1 0.0416(5) 0.1039(8) 0.0996(8) 0.0119(6) 0.0262(5) 0.0166(5)
 O1 0.0391(11) 0.0557(13) 0.0521(13) 0.0105(11) 0.0103(10) 0.0048(10)
 N1 0.0417(13) 0.0384(14) 0.0448(15) 0.0043(12) 0.0151(11) 0.0001(11)
 C16 0.0336(14) 0.0336(15) 0.0376(16) -0.0024(14) 0.0074(12) -0.0014(12)
 C10 0.0319(13) 0.0353(16) 0.0370(16) 0.0017(13) 0.0054(12) -0.0019(13)
 C20 0.0333(14) 0.0373(17) 0.056(2) -0.0055(16) 0.0084(14) 0.0041(13)
 C18 0.0469(16) 0.0367(17) 0.0442(18) -0.0036(15) 0.0125(14) 0.0050(14)
 C9 0.0324(14) 0.0339(16) 0.0390(16) -0.0034(14) 0.0075(12) -0.0028(12)
 C8 0.0369(14) 0.0378(16) 0.0474(18) 0.0055(15) 0.0076(13) 0.0048(13)
 C1 0.0404(15) 0.0399(17) 0.0454(18) 0.0021(15) 0.0069(14) 0.0023(14)
 C21 0.0378(14) 0.0381(16) 0.0423(17) 0.0007(15) 0.0100(13) 0.0002(14)
 C17 0.0546(18) 0.0454(18) 0.0384(17) 0.0005(16) 0.0145(14) -0.0033(16)
 C11 0.0354(14) 0.0336(16) 0.0514(19) -0.0002(14) 0.0122(13) -0.0041(13)
 C12 0.0490(17) 0.0425(18) 0.0507(19) 0.0020(15) 0.0164(15) 0.0073(15)
 C19 0.0408(15) 0.0371(17) 0.0436(18) 0.0001(15) -0.0013(13) -0.0009(14)
 C15 0.0420(16) 0.0407(17) 0.055(2) -0.0017(16) 0.0104(14) -0.0049(14)
 C14 0.0375(16) 0.058(2) 0.063(2) -0.0018(18) 0.0063(15) -0.0131(16)
 C2 0.0486(17) 0.0388(17) 0.0346(16) -0.0031(14) 0.0059(13) -0.0092(14)
 C13 0.0331(15) 0.061(2) 0.053(2) 0.0128(18) 0.0118(14) 0.0038(15)
 C3 0.065(2) 0.050(2) 0.048(2) 0.0049(17) 0.0064(16) -0.0140(18)
 C7 0.0510(17) 0.0407(18) 0.0377(17) 0.0068(15) 0.0040(14) -0.0012(15)
 C5 0.087(3) 0.061(2) 0.060(2) 0.012(2) -0.009(2) 0.016(2)
 C4 0.098(3) 0.048(2) 0.050(2) 0.0130(18) 0.000(2) -0.012(2)
 C6 0.060(2) 0.070(2) 0.058(2) 0.008(2) -0.0011(17) 0.0123(19)

_geom_special_details
;
 All esds (except the esd in the dihedral angle between two l.s. planes) 
 are estimated using the full covariance matrix.  The cell esds are taken 
 into account individually in the estimation of esds in distances, angles 
 and torsion angles; correlations between esds in cell parameters are only 
 used when they are defined by crystal symmetry.  An approximate (isotropic) 
 treatment of cell esds is used for estimating esds involving l.s. planes. 
;
loop_
  _geom_bond_atom_site_label_1
  _geom_bond_atom_site_label_2
  _geom_bond_distance
  _geom_bond_site_symmetry_2
  _geom_bond_publ_flag
 Cl2 C19 1.742(3) . ?
 Cl1 C13 1.737(3) . ?
 O1 C1 1.367(3) . ?
 O1 C7 1.383(3) . ?
 N1 C1 1.303(3) . ?
 N1 C2 1.394(3) . ?
 C16 C18 1.385(3) . ?
 C16 C9 1.488(3) . ?
 C16 C21 1.393(3) . ?
 C10 C9 1.495(3) . ?
 C10 C11 1.381(3) . ?
 C10 C15 1.391(3) . ?
 C20 H20 0.9300 . ?
 C20 C21 1.385(4) . ?
 C20 C19 1.376(4) . ?
 C18 H18 0.9300 . ?
 C18 C17 1.386(4) . ?
 C9 C8 1.333(3) . ?
 C8 H8 0.9300 . ?
 C8 C1 1.436(4) . ?
 C21 H21 0.9300 . ?
 C17 H17 0.9300 . ?
 C17 C19 1.371(4) . ?
 C11 H11 0.9300 . ?
 C11 C12 1.385(3) . ?
 C12 H12 0.9300 . ?
 C12 C13 1.371(4) . ?
 C15 H15 0.9300 . ?
 C15 C14 1.385(4) . ?
 C14 H14 0.9300 . ?
 C14 C13 1.368(4) . ?
 C2 C3 1.381(4) . ?
 C2 C7 1.386(4) . ?
 C3 H3 0.9300 . ?
 C3 C4 1.377(4) . ?
 C7 C6 1.371(4) . ?
 C5 H5 0.9300 . ?
 C5 C4 1.387(5) . ?
 C5 C6 1.370(4) . ?
 C4 H4 0.9300 . ?
 C6 H6 0.9300 . ?

loop_
  _geom_angle_atom_site_label_1
  _geom_angle_atom_site_label_2
  _geom_angle_atom_site_label_3
  _geom_angle
  _geom_angle_site_symmetry_1
  _geom_angle_site_symmetry_3
  _geom_angle_publ_flag
 C1 O1 C7 104.3(2) . . ?
 C1 N1 C2 104.9(2) . . ?
 C18 C16 C9 121.3(2) . . ?
 C18 C16 C21 117.4(2) . . ?
 C21 C16 C9 121.3(2) . . ?
 C11 C10 C9 121.2(2) . . ?
 C11 C10 C15 118.4(2) . . ?
 C15 C10 C9 120.3(2) . . ?
 C21 C20 H20 120.5 . . ?
 C19 C20 H20 120.5 . . ?
 C19 C20 C21 119.1(3) . . ?
 C16 C18 H18 119.0 . . ?
 C16 C18 C17 121.9(3) . . ?
 C17 C18 H18 119.0 . . ?
 C16 C9 C10 115.9(2) . . ?
 C8 C9 C16 119.6(2) . . ?
 C8 C9 C10 124.5(2) . . ?
 C9 C8 H8 114.4 . . ?
 C9 C8 C1 131.2(3) . . ?
 C1 C8 H8 114.4 . . ?
 O1 C1 C8 121.6(2) . . ?
 N1 C1 O1 114.6(2) . . ?
 N1 C1 C8 123.8(2) . . ?
 C16 C21 H21 119.3 . . ?
 C20 C21 C16 121.5(3) . . ?
 C20 C21 H21 119.3 . . ?
 C18 C17 H17 120.6 . . ?
 C19 C17 C18 118.9(3) . . ?
 C19 C17 H17 120.6 . . ?
 C10 C11 H11 119.5 . . ?
 C10 C11 C12 121.1(2) . . ?
 C12 C11 H11 119.5 . . ?
 C11 C12 H12 120.3 . . ?
 C13 C12 C11 119.3(3) . . ?
 C13 C12 H12 120.3 . . ?
 C20 C19 Cl2 119.3(2) . . ?
 C17 C19 Cl2 119.5(2) . . ?
 C17 C19 C20 121.2(3) . . ?
 C10 C15 H15 119.7 . . ?
 C14 C15 C10 120.6(3) . . ?
 C14 C15 H15 119.7 . . ?
 C15 C14 H14 120.2 . . ?
 C13 C14 C15 119.7(3) . . ?
 C13 C14 H14 120.2 . . ?
 C3 C2 N1 131.5(3) . . ?
 C3 C2 C7 119.9(3) . . ?
 C7 C2 N1 108.6(2) . . ?
 C12 C13 Cl1 119.3(2) . . ?
 C14 C13 Cl1 119.7(2) . . ?
 C14 C13 C12 120.9(3) . . ?
 C2 C3 H3 121.4 . . ?
 C4 C3 C2 117.2(3) . . ?
 C4 C3 H3 121.4 . . ?
 O1 C7 C2 107.5(2) . . ?
 C6 C7 O1 128.8(3) . . ?
 C6 C7 C2 123.6(3) . . ?
 C4 C5 H5 119.0 . . ?
 C6 C5 H5 119.0 . . ?
 C6 C5 C4 122.1(3) . . ?
 C3 C4 C5 121.5(3) . . ?
 C3 C4 H4 119.3 . . ?
 C5 C4 H4 119.3 . . ?
 C7 C6 H6 122.2 . . ?
 C5 C6 C7 115.7(3) . . ?
 C5 C6 H6 122.2 . . ?

loop_
  _geom_torsion_atom_site_label_1
  _geom_torsion_atom_site_label_2
  _geom_torsion_atom_site_label_3
  _geom_torsion_atom_site_label_4
  _geom_torsion
  _geom_torsion_site_symmetry_1
  _geom_torsion_site_symmetry_2
  _geom_torsion_site_symmetry_3
  _geom_torsion_site_symmetry_4
  _geom_torsion_publ_flag
 O1 C7 C6 C5 178.3(3) . . . . ?
 N1 C2 C3 C4 -177.2(3) . . . . ?
 N1 C2 C7 O1 -0.8(3) . . . . ?
 N1 C2 C7 C6 177.8(3) . . . . ?
 C16 C18 C17 C19 -0.2(4) . . . . ?
 C16 C9 C8 C1 -179.8(3) . . . . ?
 C10 C9 C8 C1 -3.0(5) . . . . ?
 C10 C11 C12 C13 -0.4(4) . . . . ?
 C10 C15 C14 C13 -0.6(4) . . . . ?
 C18 C16 C9 C10 -30.6(3) . . . . ?
 C18 C16 C9 C8 146.4(3) . . . . ?
 C18 C16 C21 C20 -0.6(4) . . . . ?
 C18 C17 C19 Cl2 -179.6(2) . . . . ?
 C18 C17 C19 C20 -0.7(4) . . . . ?
 C9 C16 C18 C17 -177.7(2) . . . . ?
 C9 C16 C21 C20 177.9(2) . . . . ?
 C9 C10 C11 C12 -175.9(2) . . . . ?
 C9 C10 C15 C14 176.5(3) . . . . ?
 C9 C8 C1 O1 -3.2(5) . . . . ?
 C9 C8 C1 N1 174.9(3) . . . . ?
 C1 O1 C7 C2 1.3(3) . . . . ?
 C1 O1 C7 C6 -177.3(3) . . . . ?
 C1 N1 C2 C3 178.5(3) . . . . ?
 C1 N1 C2 C7 -0.1(3) . . . . ?
 C21 C16 C18 C17 0.8(4) . . . . ?
 C21 C16 C9 C10 150.9(2) . . . . ?
 C21 C16 C9 C8 -32.1(4) . . . . ?
 C21 C20 C19 Cl2 179.81(19) . . . . ?
 C21 C20 C19 C17 0.9(4) . . . . ?
 C11 C10 C9 C16 115.9(3) . . . . ?
 C11 C10 C9 C8 -60.9(4) . . . . ?
 C11 C10 C15 C14 0.3(4) . . . . ?
 C11 C12 C13 Cl1 177.8(2) . . . . ?
 C11 C12 C13 C14 0.1(4) . . . . ?
 C19 C20 C21 C16 -0.2(4) . . . . ?
 C15 C10 C9 C16 -60.2(3) . . . . ?
 C15 C10 C9 C8 123.0(3) . . . . ?
 C15 C10 C11 C12 0.2(4) . . . . ?
 C15 C14 C13 Cl1 -177.3(2) . . . . ?
 C15 C14 C13 C12 0.4(5) . . . . ?
 C2 N1 C1 O1 0.9(3) . . . . ?
 C2 N1 C1 C8 -177.4(3) . . . . ?
 C2 C3 C4 C5 -0.8(5) . . . . ?
 C2 C7 C6 C5 0.0(5) . . . . ?
 C3 C2 C7 O1 -179.5(2) . . . . ?
 C3 C2 C7 C6 -0.9(4) . . . . ?
 C7 O1 C1 N1 -1.4(3) . . . . ?
 C7 O1 C1 C8 176.9(3) . . . . ?
 C7 C2 C3 C4 1.3(4) . . . . ?
 C4 C5 C6 C7 0.5(5) . . . . ?
 C6 C5 C4 C3 -0.1(5) . . . . ?

_olex2_submission_special_instructions 'No special instructions were received'
